# Supplementary material
Source: publisher figshare collection journal article supplement (https://karger.figshare.com/ndownloader/files/23582420)
Supplement: Supplementary file 1 [file 23582420]

Risk of bias assessment of studies included in meta-analysis

| Study | Adequate Case Definition | Representativeness of the Cases | Selection of Controls | Definition of Controls | Comparability of Cases and Controls on the Basis of the Design or Analysis | Ascertainment of Exposure | Same method of ascertainment for cases and controls | Non-Response Rate | Overall |
| --- | --- | --- | --- | --- | --- | --- | --- | --- | --- |
| Hasui, Y. 1994 | 1 | 1 | 1 | 1 | 1 | 1 | 1 | 1 | 8 |
| Holmäng, S. 1997 | 1 | 1 | 1 | 1 | 1 | 1 | 1 | 1 | 8 |
| Smits, G. 1998 | 1 | 1 | 1 | 1 | 1 | 1 | 1 | 1 | 8 |
| Cheng, L. 1999 | 1 | 1 | 1 | 1 | 1 | 1 | 1 | 1 | 8 |
| Kondylis, F. I. 2000 | 1 | 1 | 1 | 1 | 1 | 1 | 1 | 1 | 8 |
| Shariat, S. F. 2000 | 1 | 1 | 1 | 1 | 1 | 1 | 1 | 1 | 8 |
| Bernardini, S. 2001 | 1 | 1 | 1 | 1 | 0 | 1 | 1 | 0 | 6 |
| Sözen, S. 2002 | 1 | 1 | 1 | 1 | 1 | 0 | 1 | 0 | 6 |
| Orsola, A. 2005 | 1 | 1 | 1 | 1 | 1 | 1 | 1 | 1 | 8 |
| Andius, P. 2007 | 1 | 1 | 1 | 1 | 1 | 1 | 1 | 1 | 8 |
| Mhawech-Fauceglia, P. 2007 | 1 | 1 | 1 | 1 | 1 | 0 | 1 | 0 | 6 |
| Queipo-Zaragoza, J. A. 2007 | 1 | 1 | 1 | 1 | 1 | 1 | 1 | 1 | 8 |
| Denzinger, S. 2007 | 1 | 1 | 1 | 1 | 1 | 1 | 1 | 1 | 8 |
| Soukup, V. 2008 | 1 | 1 | 1 | 1 | 0 | 1 | 1 | 1 | 7 |
| Faivre d'Arcier, B. 2010 | 1 | 1 | 1 | 1 | 1 | 1 | 1 | 1 | 8 |
| Bertz, S. 2011 | 1 | 1 | 1 | 1 | 1 | 1 | 1 | 1 | 8 |
| Orsola, A. 2011 | 1 | 1 | 1 | 1 | 1 | 1 | 1 | 1 | 8 |
| Chang, W. C. 2012 | 1 | 1 | 1 | 1 | 1 | 1 | 1 | 1 | 8 |
| van Rhijn, B. W. 2012 | 1 | 1 | 1 | 1 | 1 | 1 | 1 | 1 | 8 |
| Lee, J. Y. 2012 | 1 | 1 | 1 | 1 | 1 | 1 | 1 | 1 | 8 |
| Palou, J. 2012 | 0 | 1 | 1 | 1 | 1 | 1 | 1 | 1 | 7 |
| Van Rhijn, B. W. G. 2012 | 1 | 1 | 1 | 1 | 1 | 1 | 1 | 1 | 8 |
| Nguyen-Huu, Y. 2012 | 1 | 1 | 1 | 1 | 1 | 1 | 1 | 1 | 8 |
| Brimo, F. 2013 | 1 | 1 | 1 | 1 | 1 | 1 | 1 | 1 | 8 |
| Rouprêt, M. 2013 | 1 | 1 | 1 | 1 | 1 | 1 | 1 | 1 | 8 |
| De Marco, V. 2014 | 1 | 1 | 1 | 1 | 1 | 1 | 1 | 1 | 8 |
| Soukup, V. 2014 | 1 | 1 | 1 | 1 | 1 | 1 | 1 | 1 | 8 |
| Orsola, A. 2015 | 1 | 1 | 1 | 1 | 1 | 1 | 1 | 1 | 8 |
| Patschan, O. 2015 | 1 | 1 | 1 | 1 | 0 | 1 | 1 | 1 | 7 |
| Patriarca, C. 2016 | 0 | 1 | 1 | 1 | 1 | 1 | 1 | 1 | 7 |
| Breyer, J. 2016 | 1 | 1 | 1 | 1 | 1 | 1 | 1 | 1 | 8 |
| Colombo, R. 2018 | 1 | 1 | 1 | 1 | 1 | 1 | 1 | 1 | 8 |
| Fransen van de Putte, E. E. 2018 | 1 | 1 | 1 | 1 | 1 | 1 | 1 | 1 | 8 |
| Turan, T. 2018 | 1 | 1 | 1 | 1 | 1 | 1 | 1 | 1 | 8 |
| Jeandin, E. 2018 | 1 | 1 | 1 | 1 | 1 | 1 | 1 | 1 | 8 |

The Newcastle-Ottawa Scale was used to evaluate risk of bias in each individual. Publications with scores >7 were assessed as “low-risk,” scores of 4 to 6 were assessed as “moderate-risk,” and scores of <4 were assessed as “high-risk.
